# Supplementary material for: Withaferin-A Can Be Used to Modulate the Keratin Network of Intermediate Filaments in Human Epidermal Keratinocytes
Source: MDPI journal article supplement (doi:10.3390/ijms21124450), 2020-06-23
Supplement: s1 [file s1]

**Actin****Keratin****Tubulin****Merge**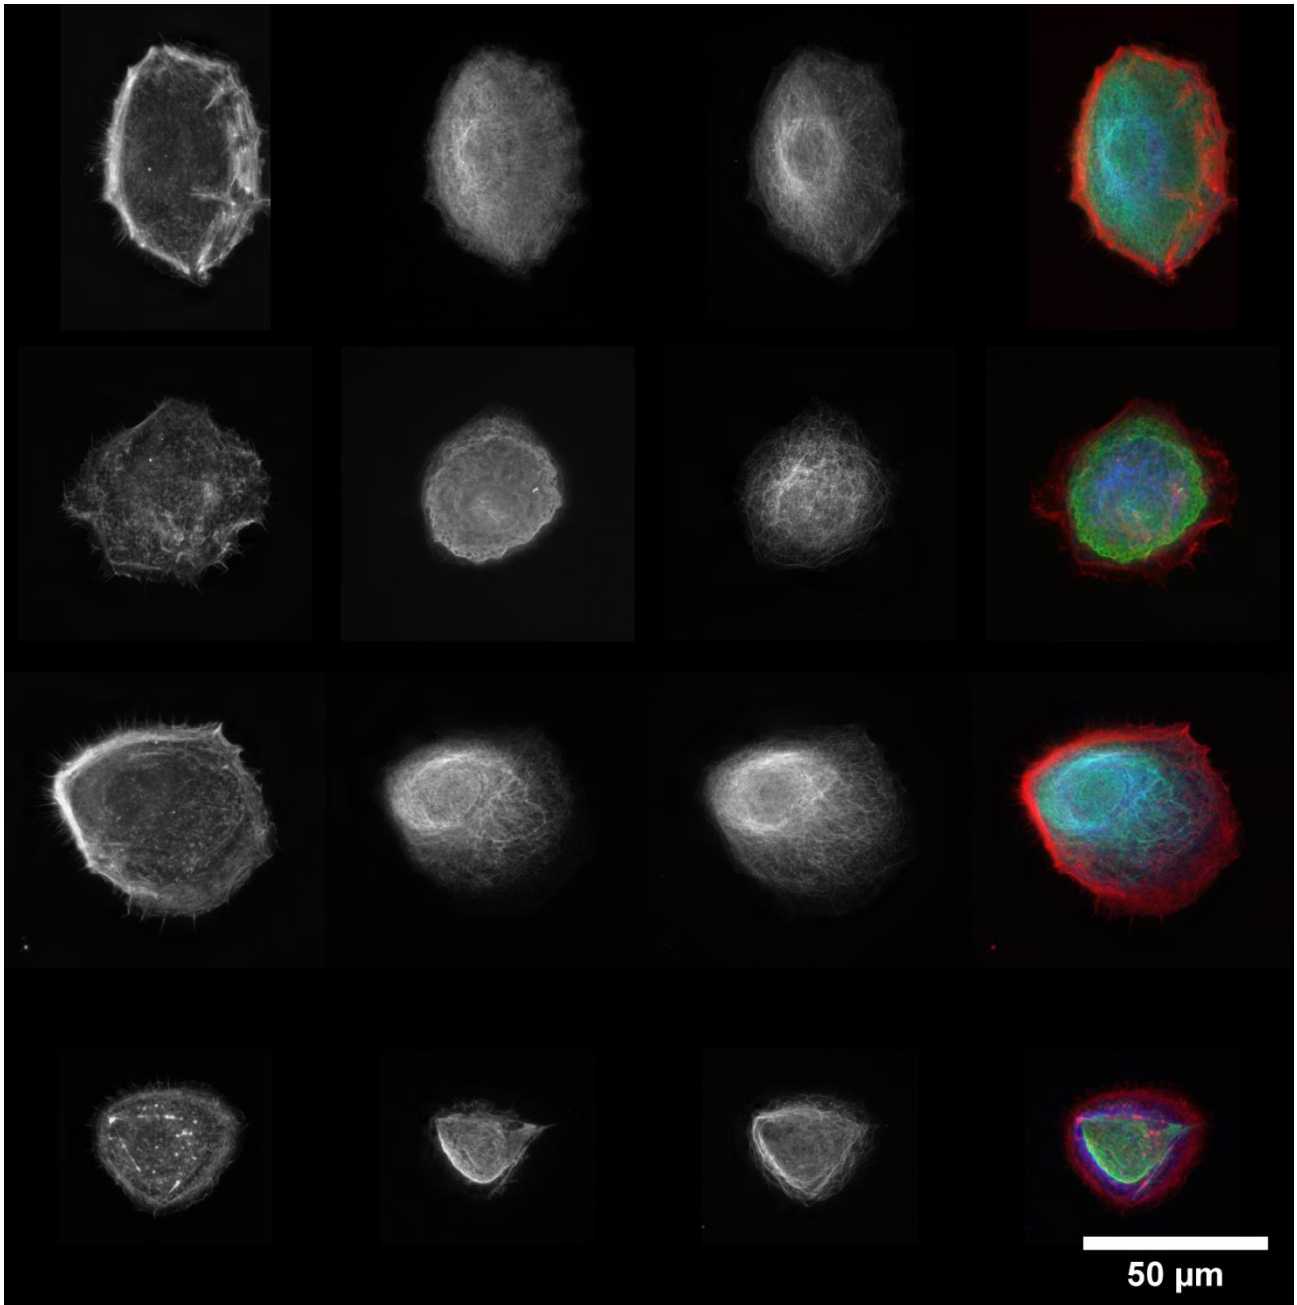

**Figure 1.** Individual CSKs and merge for control and 0.5-3  $\mu$ M WFA.

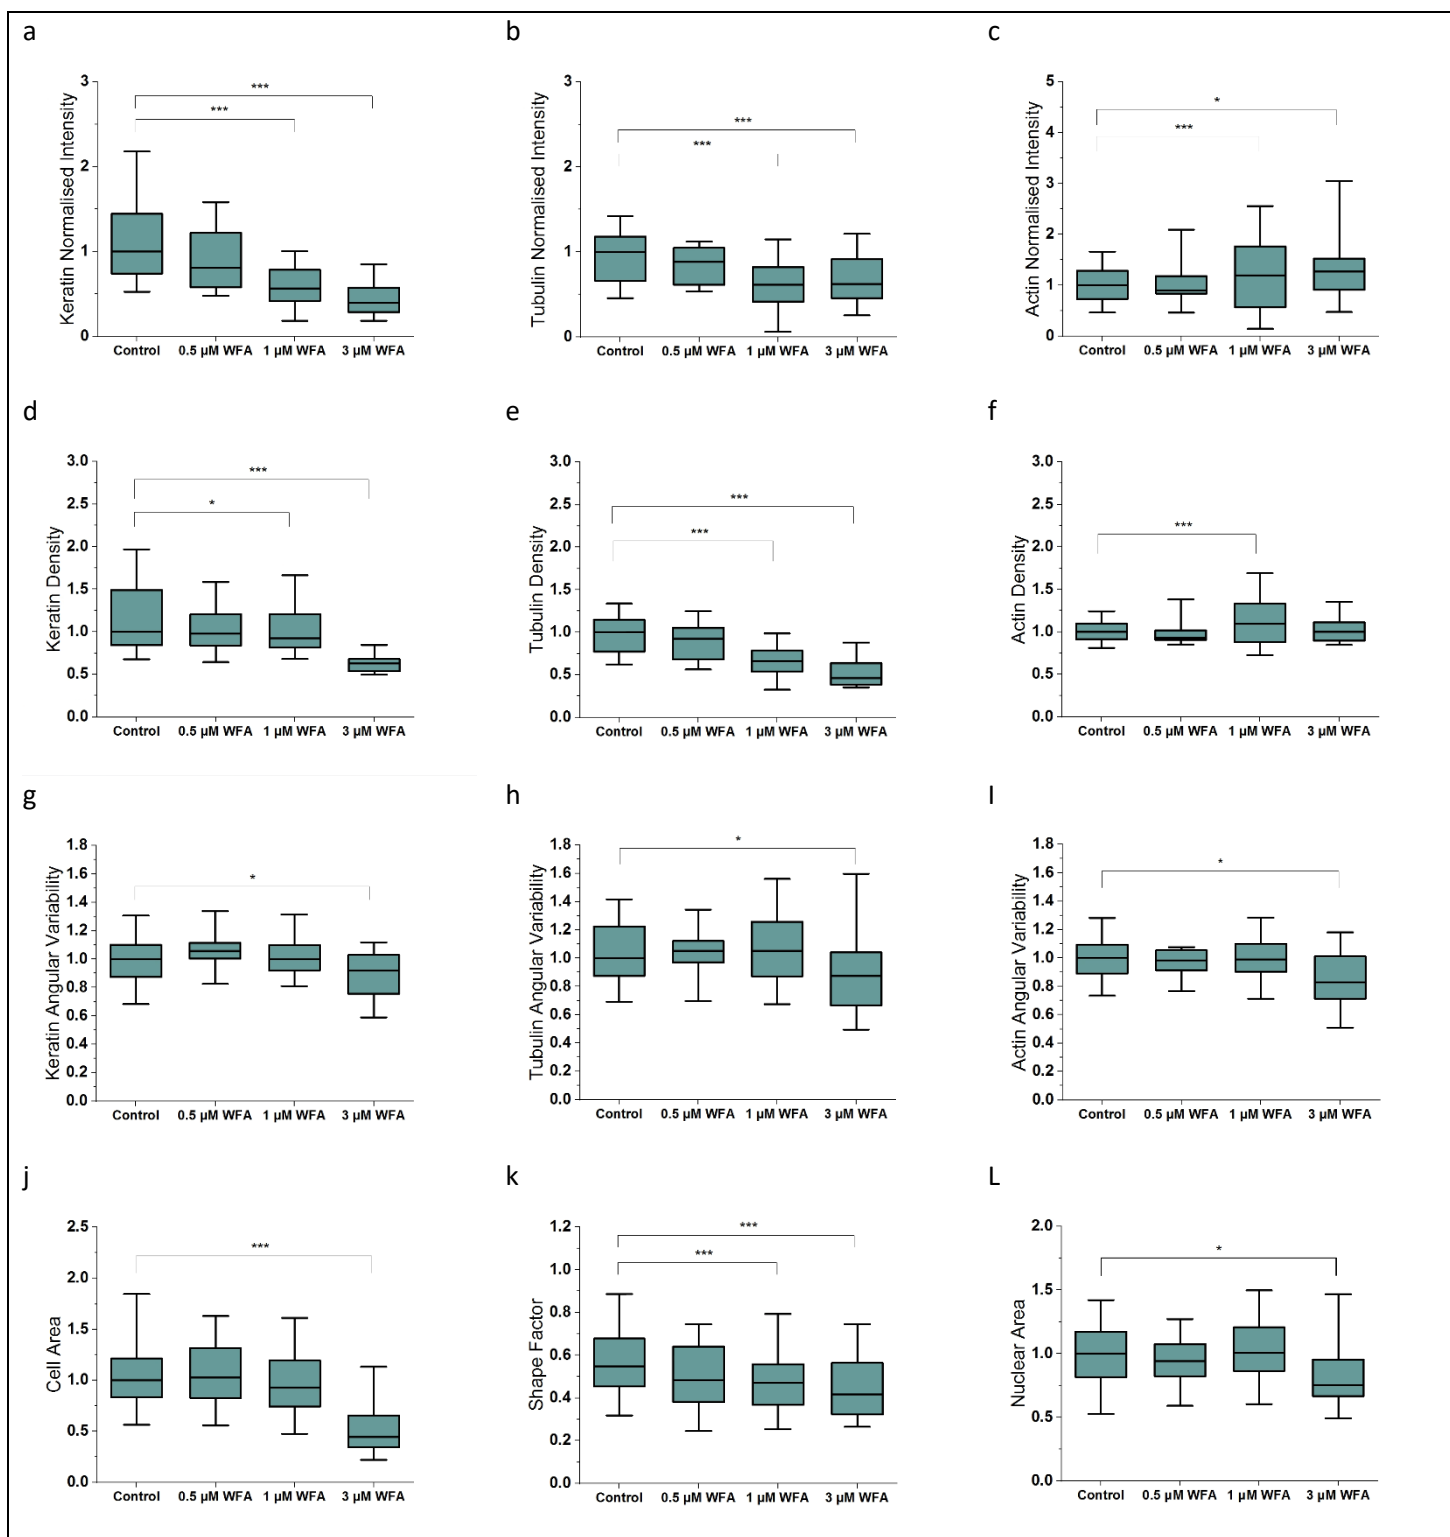

**Figure 2.** a-c CSK Intensity Normalised by Cell Area changes with WFA, d-f, CSK Network Density changes with WFA, g-l, CSK angular variability changes with WFA, j, Cell Area, k, shape factor and l, Nuclear Area change with WFA.

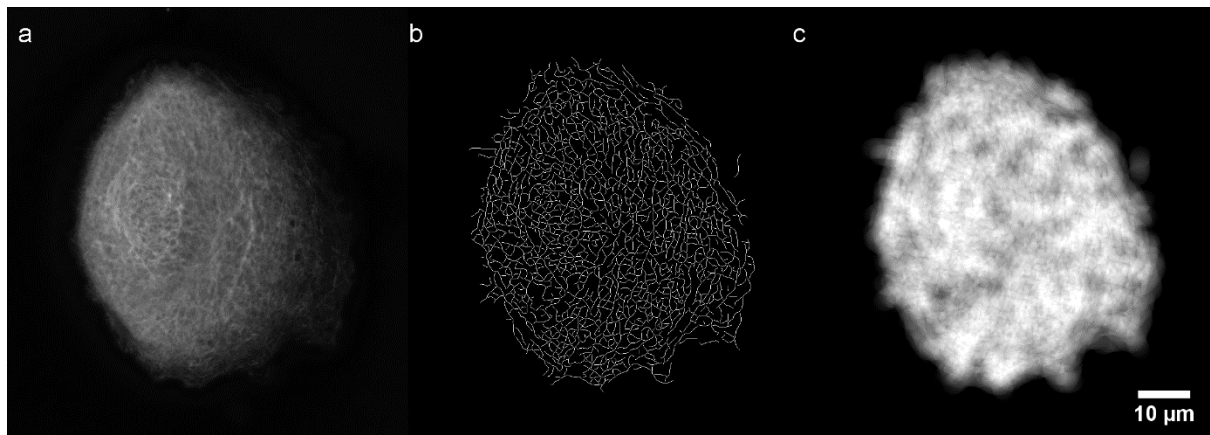

**Figure 3.** (a) Keratin Intensity image, (b) result of filament segmentation, (c) Self Proximity score using a disk-shaped filter. The mean of the score within the cell boundary gives the network density.

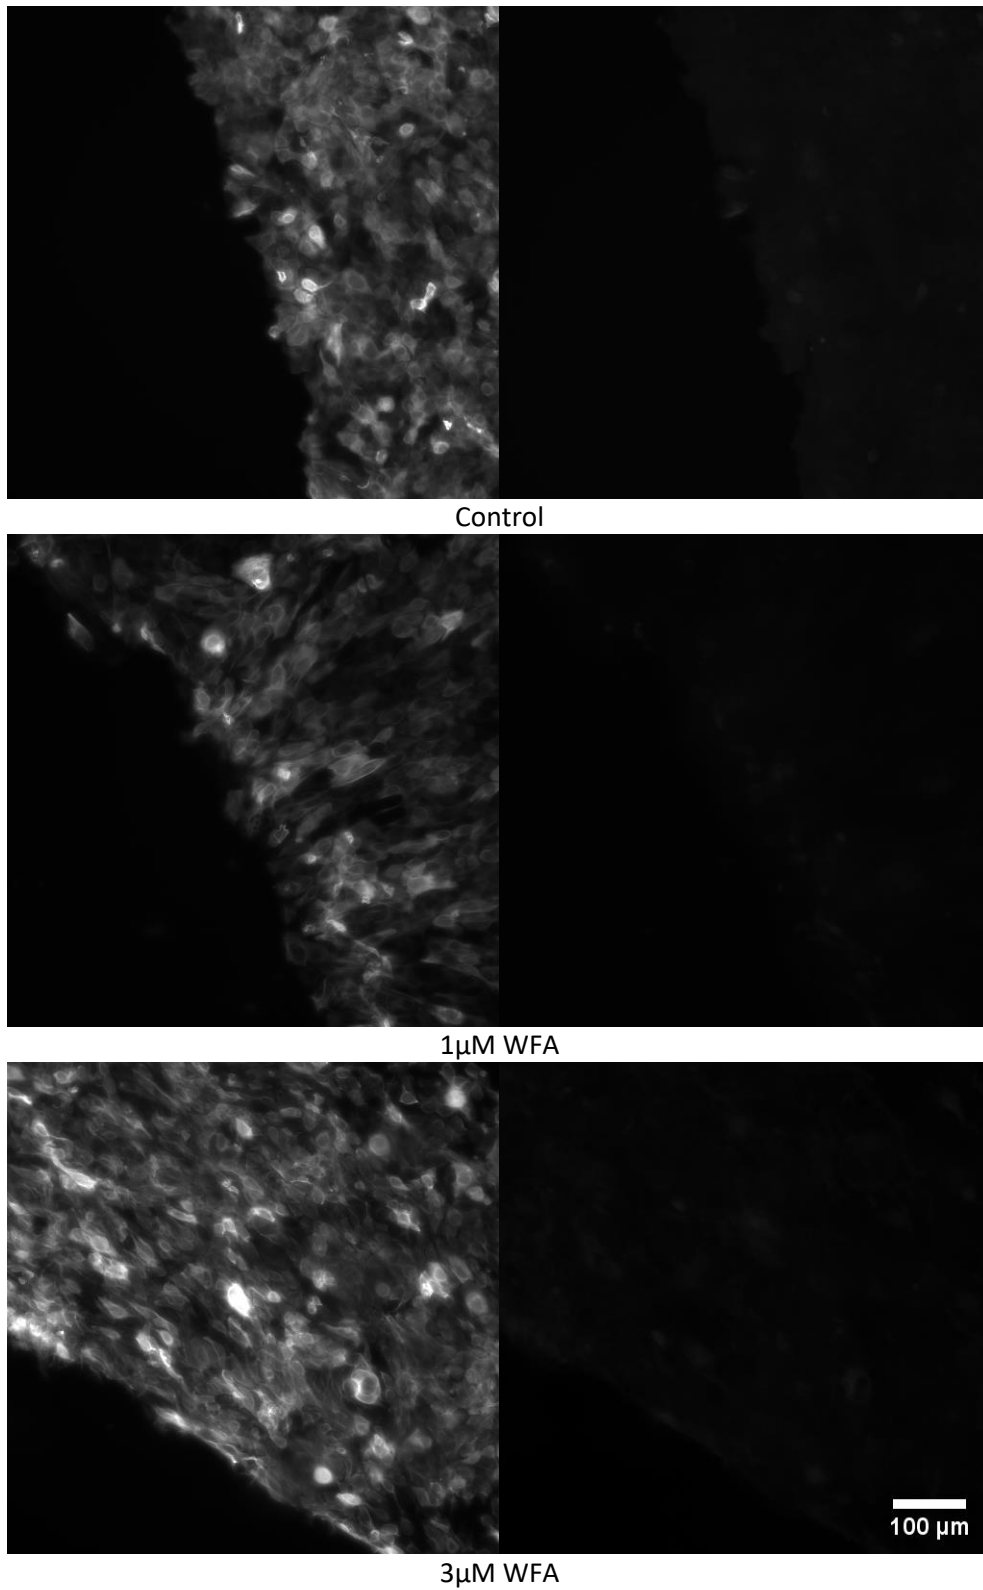

**Figure 4.** HaCaT cells with GP-K14 (left, exposure time=0.14 seconds) stained for vimentin (right, exposure time=1.8 seconds). Magnification 20x.
